# Supplementary material
Source: PubMed Central journal article supplement (PMC4059257)

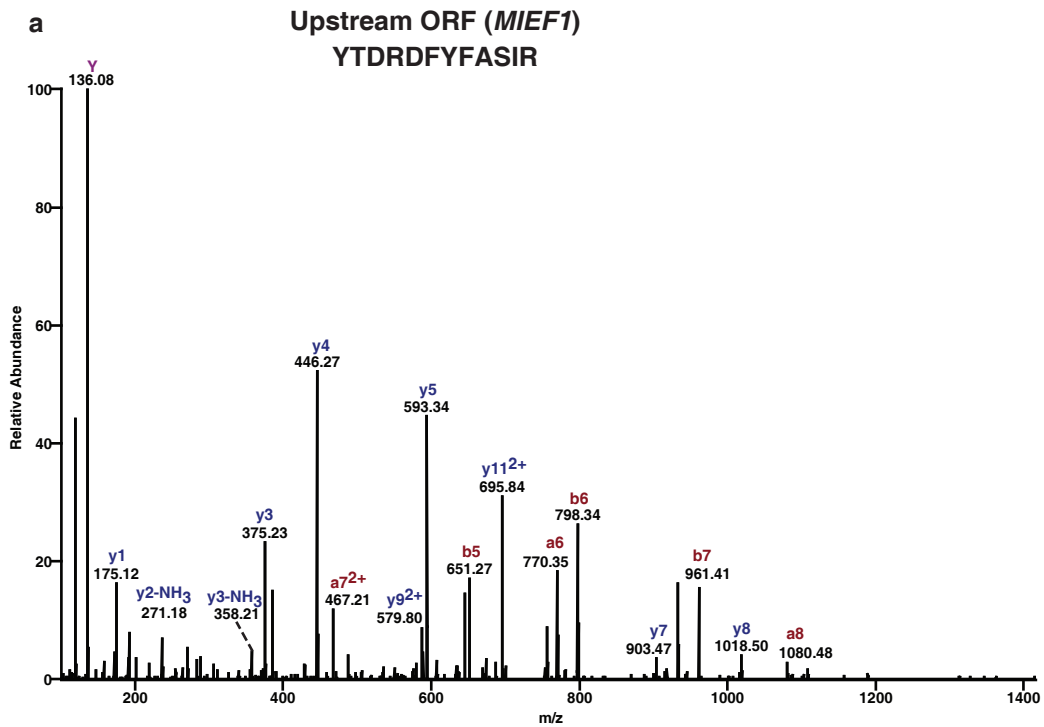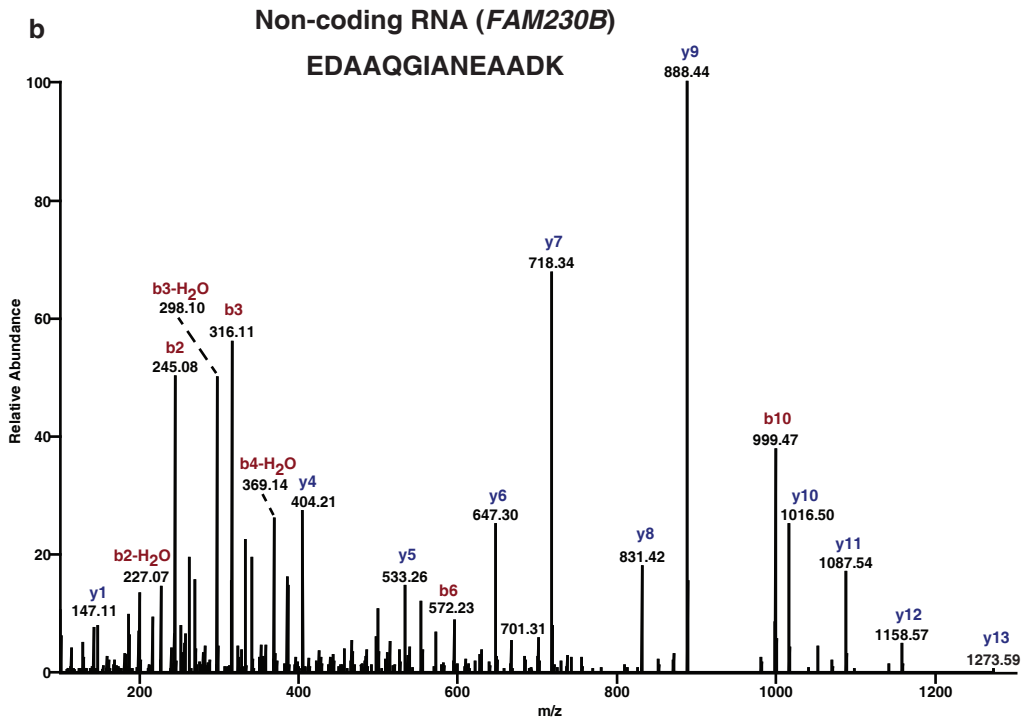

**c**

**N-terminal protein extension (*TPST2*)**  
**ALPADSLGTQAQGLEPR**

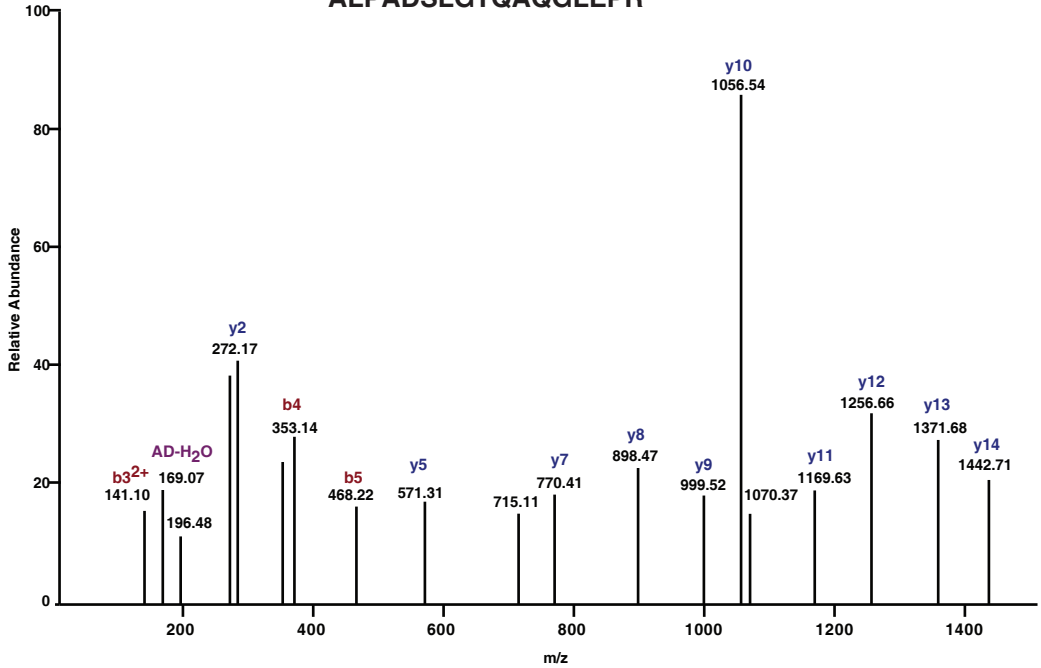**d**

**N-terminal protein extension (*TPST2*)**  
**CEPGLPANLSLKPQK**

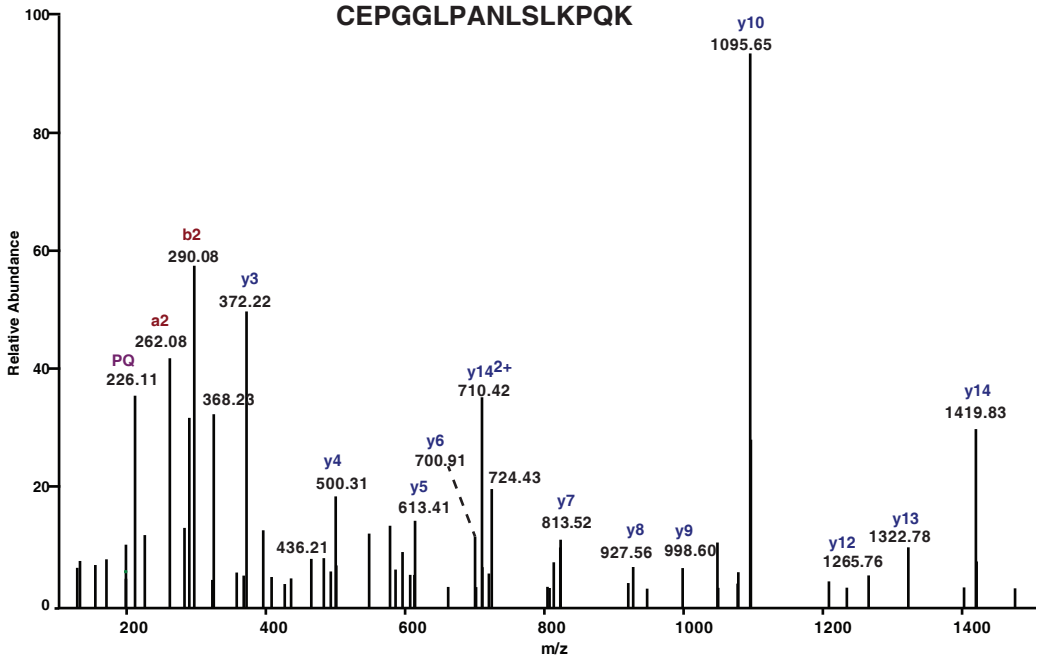

e

Novel coding exon (SMTN)  
VAVTQAAEVAVATVEPVAR

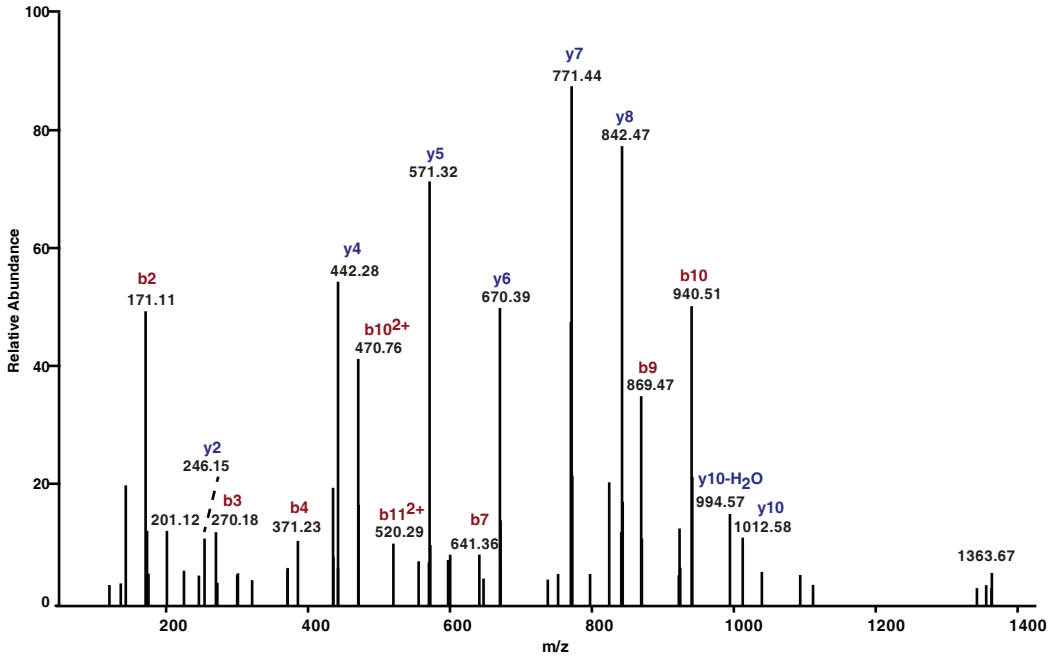

Supplement: pr401169d_si_001.pdf [file pr401169d_si_001.pdf]
